# Supplementary material for: Vanquishing the computational cost of passive gamma emission tomography simulations leveraging physics-aware reduced order modeling
Source: PubMed Central journal article supplement (PMC10497611; doi:10.1038/s41598-023-41220-3), 2023-09-12
Supplement: 41598_2023_41220_MOESM1_ESM.pdf [file 41598_2023_41220_MOESM1_ESM.pdf]

Supplementary Material to the paper: Vanquishing the computational  
cost of passive gamma emission tomography simulations: a  
physics-aware reduced order modeling approach

Nicola Cavallini<sup>1</sup>, Riccardo Ferretti<sup>1</sup>, Gunnar Bostrom<sup>1</sup>, Stephen Croft<sup>2</sup>, Aurora Fassi<sup>1</sup>, Giovanni Mercurio<sup>1</sup>, Stefan Nonneman<sup>1</sup>, and Andrea Favalli<sup>1,3,\*</sup>

<sup>1</sup>European Commission, Joint Research Centre, Via Enrico Fermi, Ispra, I -21027 (Va), Italy

<sup>2</sup>Lancaster University, Bailrigg, Lancaster, UK

<sup>3</sup>Los Alamos National Laboratory, P.O. Box 1663, Los Alamos, NM 87545, USA

\*andrea.favalli@ec.europa.eu

March 6, 2023

VVER assembly, error maps and cumulative distribution,  
for,  $N_s = 60$ ,  $k = 60$ .

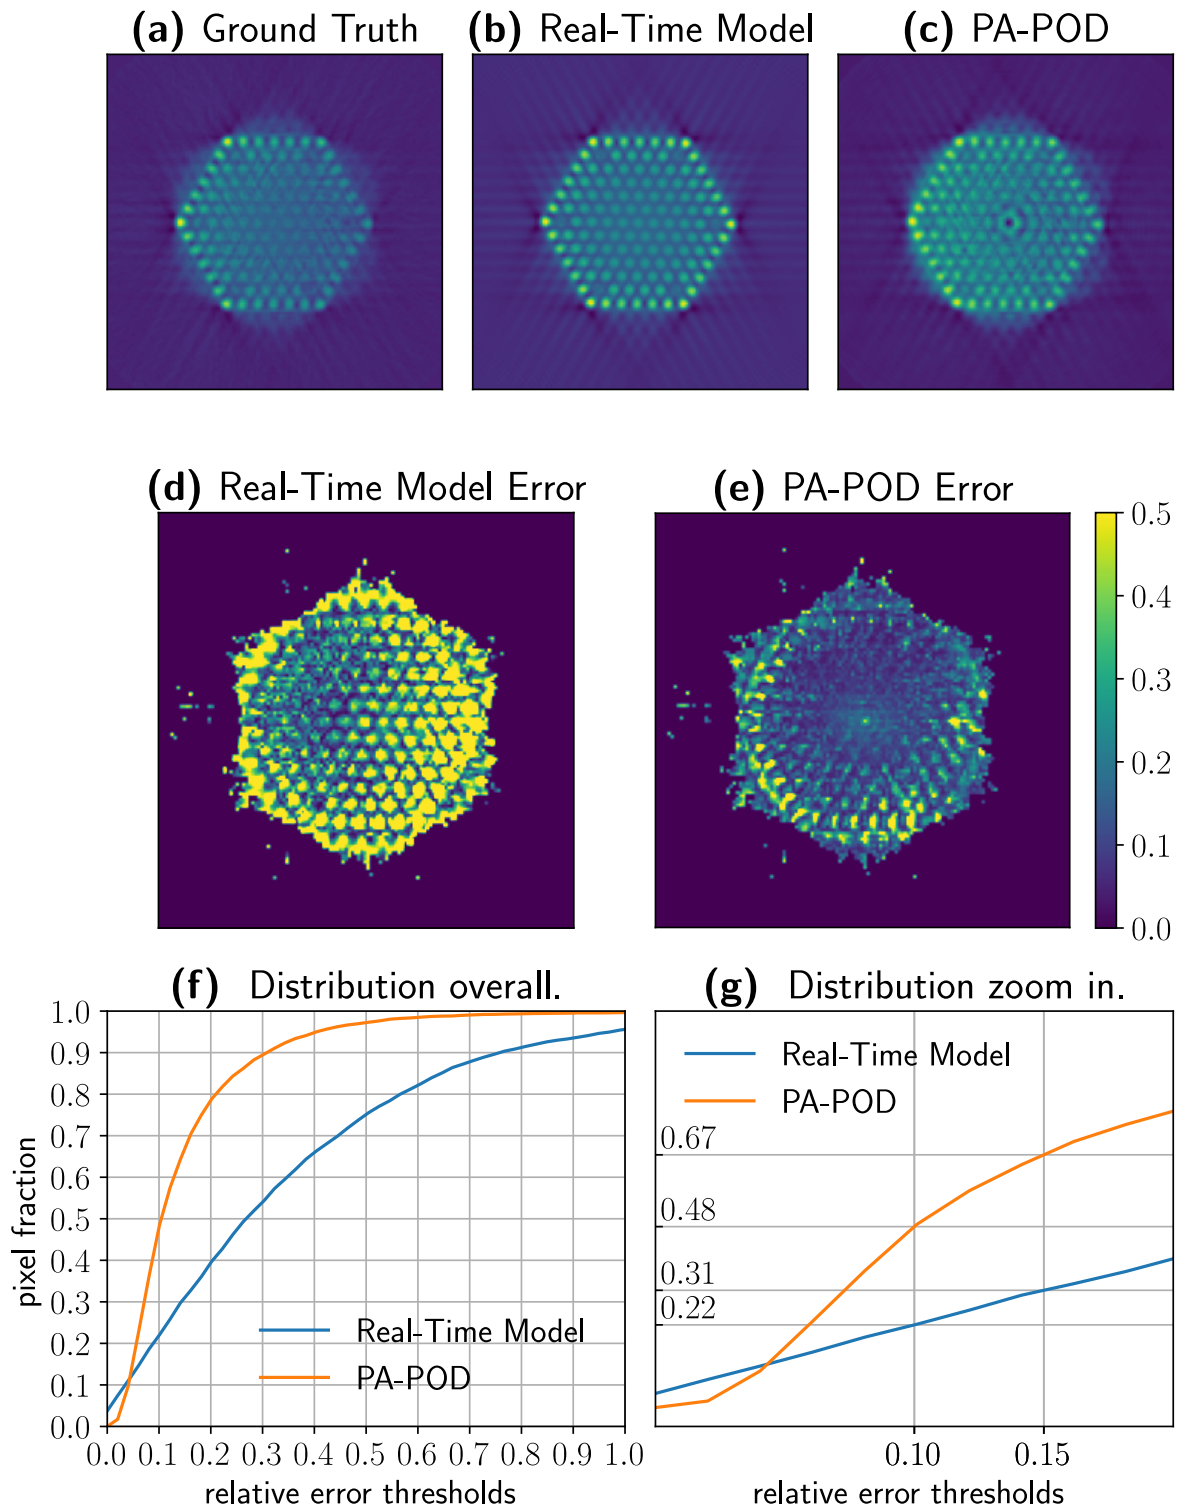

Supplementary Figure 1: (a) Ground truth; (b) Real-Time Model; (c) PA-POD; (d) Relative error for the Real-Time Model solution; (e) Relative error map for the PA-POD approximated sinogram. In the PA-POD case we randomly sample sixty views of the spent fuel, we repeat the sample one hundred times, and for each pixel, we collect the median of the sampled data. (f): Overall error distribution expressed in pixel fraction; (g): Zoom and highlight on the 10% and 15% error thresholds.

BWR assembly, error maps and cumulative distribution,  
for,  $N_s = 60$ ,  $k = 60$ .

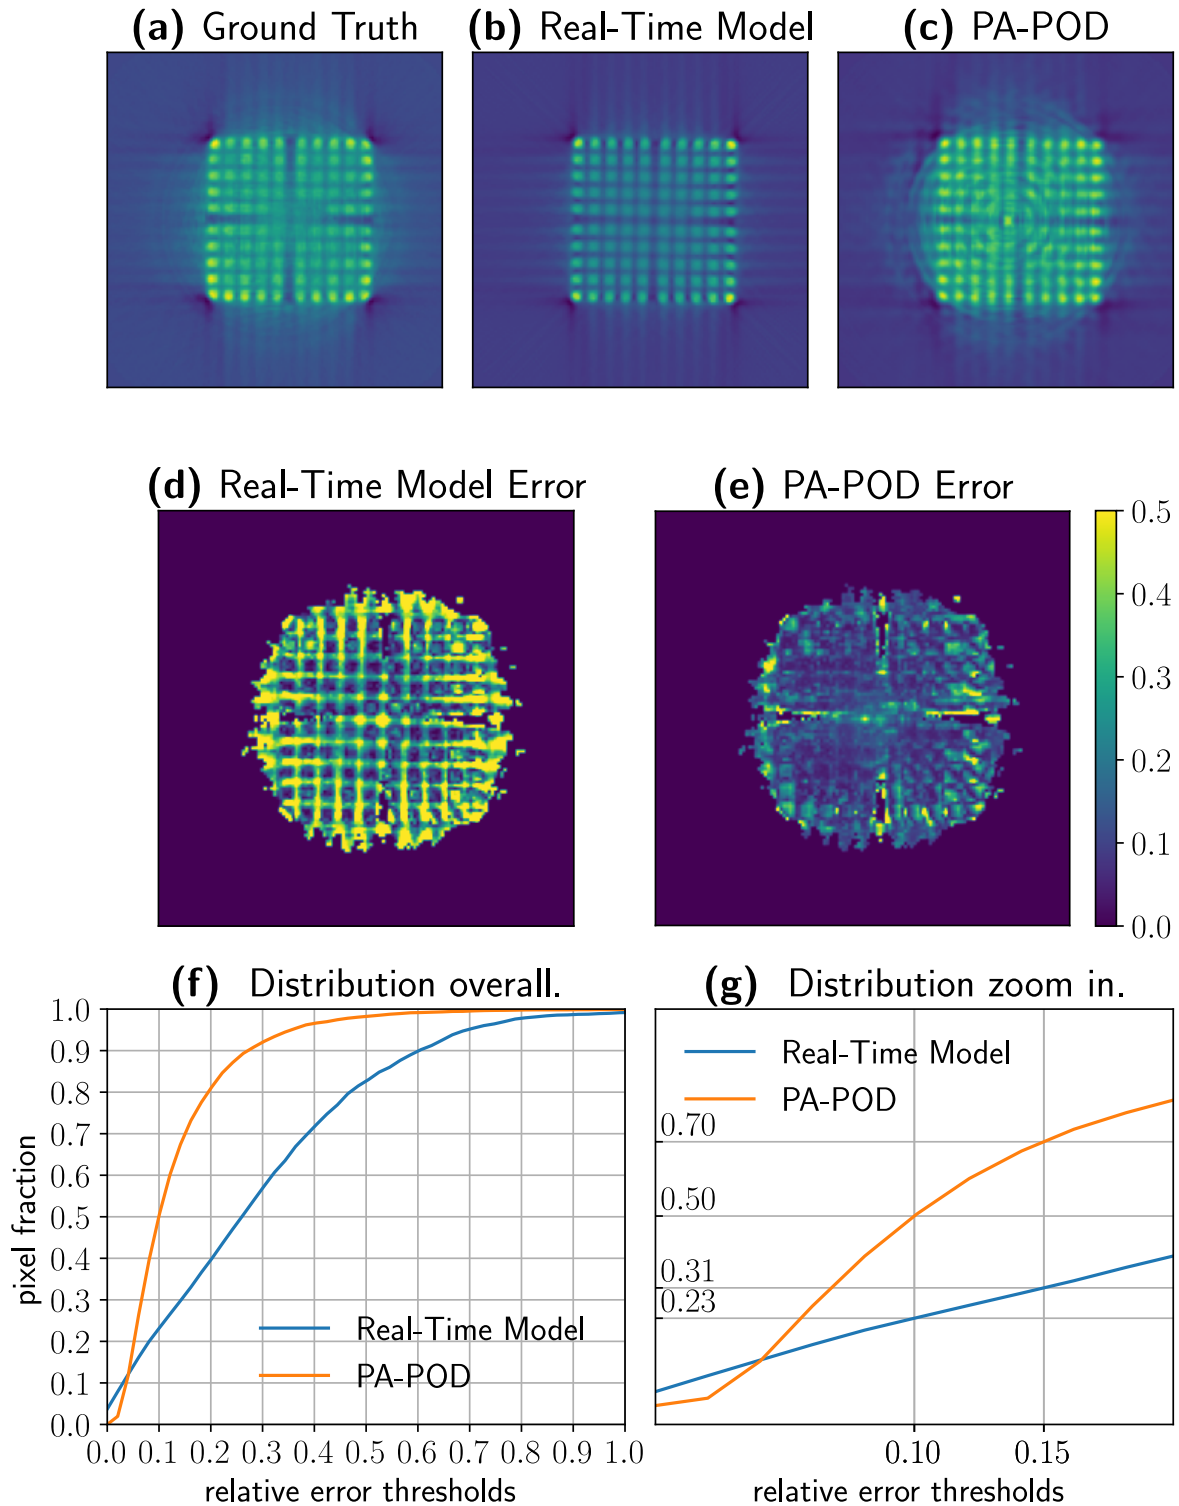

Supplementary Figure 2: (a) Ground truth; (b) Real-Time Model; (c) PA-POD; (d) Relative error for the Real-Time Model solution; (e) Relative error map for the PA-POD approximated sinogram. In the PA-POD case we randomly sample sixty views of the spent fuel, we repeat the sample one hundred times, and for each pixel, we collect the median of the sampled data. (d): Overall error distribution expressed in pixel fraction; (e): Zoom and highlight on the 10% and 15% error thresholds.
